# Supplementary material for: A novel target for cancer therapy on the RNA stimulation by FUBP1- interacting repressor (FIR) via TFIIH/P62
Source: Research Square preprint supplement (doi:10.21203/rs.3.rs-1722555/v2), 2022-07-19
Supplement: Supplementary file 1 [file bf1c3f592ef8ca5d65163497.xlsx]

## Sheet: Sheet2
Table 1. RPs genes affected by overexpression or knockdown of FIR or FIRΔexon2 (HeLa cells).
	categories (number of RP genes)	Condition of FIR or FIRΔexon2	RP genes
FIR	Gr1 (31)	Overexpression	RPL12, RPL13, RPL13A, RPL14, RPL17, RPL18, RPL23, RPL24, RPL27, RPL28, RPL29, RPL31, RPL35, RPL35A, RPL6, RPL8, RPLP0, RPLP1, RPS11, RPS12, RPS15, RPS17, RPS17L, RPS2, RPS28, RPS3, RPS5, RPS7, RPS8, RPS9, RPSA
	Gr2 (16)	Overlapped RPs genes affected by both overexpression and kockdown of FIR	RPL18A, RPL19, RPL23A, RPL30, RPL36, RPL37, RPL37A, RPL38, , RPS6, RPS10, RPS14, RPS15A, RPS16, RPS19, RPS21, RPS29
	Gr3 (3)	Knockdown	RPL26, RPL39, RPS27
FIRΔexon2	Gr4 (22)	Overexpression	RPL10A, RPL15, RPL17, RPL18, RPL18A, RPL24, RPL29, RPL34, RPL36, RPL6, RPLP1, RPS15, RPS16, RPS19, RPS2, RPS20, RPS27A, RPS4X, RPS5, RPS7, RPS9, RPSA
	Gr5 (35)	Overlapped RPs genes affected by both overexpression and kockdown of FIRΔexon2	RPL12, RPL13A, RPL14, RPL19, RPL21, RPL23, RPL23A, RPL26, RPL27, RPL30, RPL31, RPL35, RPL35A, RPL37, RPL37A, RPL38, RPL4, RPL5, RPL9, RPLP0, RPS10, RPS11, RPS12, RPS13, RPS14, RPS15A, RPS17, RPS17L, RPS18, RPS21, RPS24, RPS27, RPS29, RPS6, RPS8
	Gr6 (8)	Knockdown	RPL11, RPL3, RPL39, RPL41, RPL7, RPL7A, RPS25, RPS3A
